1            **Mechanical Heterogeneity in the Bone Microenvironment as**  
2                            **Characterised by Atomic Force Microscopy**

3            X. Chen, R. Hughes, N. Mullin, R. J. Hawkins, I. Holen, N. J. Brown and J. K. Hobbs

4    **KEYWORDS.** Force map, viscoelasticity, AFM, bone microenvironment.

5    **RUNNING TITLE.** Mechanical heterogeneity of bone.

6

7 ABSTRACT. Bones are structurally heterogeneous organs with diverse functions that  
8 undergo mechanical stimuli across multiple length scales. Mechanical characterisation of the  
9 bone microenvironment is important for understanding how bones function in health and  
10 disease. Here we describe the mechanical architecture of cortical bone, the growth plate,  
11 metaphysis and marrow in fresh murine bones, probed using atomic force microscopy in  
12 physiological buffer. Both elastic and viscoelastic properties are found to be highly  
13 heterogeneous with moduli ranging over 3 to 5 orders of magnitude, both within and across  
14 regions. All regions include extremely soft areas, with moduli of a few Pascal and viscosities  
15 as low as tens Pa·s. Aging impacts the viscoelasticity of the bone marrow strongly but has  
16 limited effect on the other regions studied. Our approach provides the opportunity to explore  
17 the mechanical properties of complex tissues at the length scale relevant to cellular processes  
18 and how these impact on aging and disease.

19

20

21 SIGNIFICANCE. The mechanical properties of biological materials at cellular scale are  
22 involved in guiding cell fate. However, there is a critical gap in our knowledge of such  
23 properties in complex tissues. The physiochemical environment surrounding the cells in *in-*  
24 *vitro* studies differs significantly from that found *in vivo*. Existing mechanical characterisation  
25 of real tissues are largely limited to properties at larger scales, structurally simple (*e.g.*  
26 epithelial monolayers) or non-intact (*e.g.* through fixation) tissues. In this paper, we address  
27 this critical gap and present the micro-mechanical properties of the relatively intact bone  
28 microenvironment. The measured Young's moduli and viscosity provide a sound guidance in  
29 bioengineering designs. The striking heterogeneity at supracellular scale reveals the potential  
30 contribution of the mechanical properties in guiding cell behaviour.

31

## 32 INTRODUCTION

33 It is increasingly clear that mechanical properties and forces play an essential role in  
34 controlling many aspects of cell biology of tissues and organs including growth, migration,  
35 differentiation, homeostasis and communication (1-3). How these fundamental cellular  
36 processes are influenced by such forces requires an understanding of the mechanical properties  
37 at a subcellular scale but in the context of the tissue, organ, or even the whole organism.  
38 Obtaining this information is particularly challenging as most traditional methods for tissue  
39 processing (*e.g.* sectioning) or fixation radically change the mechanical properties of at least  
40 part of the structure (*e.g.* by freezing and thawing). Similarly, obtaining the relevant spatial and  
41 temporal resolution with sufficient force sensitivity to systematically determine the relevant  
42 mechanical variation at the different cell and tissue scales requires new specialised approaches.  
43 Here we present an atomic force microscopy (AFM) based approach for tackling these issues  
44 allowing the study of bones, a unique and mechanically complex organ.

45 Bone tissue consists predominantly of two types of bone, cortical and trabecular. The  
46 cortical bone (also known as dense bone) is structurally compact and bears the load of the  
47 body's weight. The trabecular bone (also known as cancellous bone or spongy bone) has a  
48 more loosely organized structure and highly metabolic activity (4). Both types of bone contain  
49 inorganic (bone mineral and water) and organic components (bone cells and matrix) that form  
50 complex, interconnected structures (5). In addition to being central to mechanical support, bone  
51 contains bone marrow which plays a significant role in mammalian physiology through  
52 hematopoiesis and by regulating immune and stromal cell trafficking (6). Bone tissues undergo  
53 continuous dynamic remodelling in response to changes in mechanical loading and during the  
54 homeostatic repair of microdamage occurring through normal 'wear and tear'. The balance  
55 between bone deposition and resorption is orchestrated by bone cells, called osteoblasts and  
56 osteoclasts, respectively (4, 5). Osteoblasts are derived from mesenchymal stem cells (MSCs)  
57 and osteoclasts are derived from hematopoietic stem cells (HSCs), both of which are resident  
58 in bone marrow (6). In addition there are a multitude of progenitor cells, immune cells, stromal  
59 cells and adipocytes involved in maintaining the homeostasis of bone.

60 The mechanical properties of bone are fundamental to the function of the skeleton (7) and  
61 changes in bone loading can influence bone turnover, a process whereby bone formation and  
62 absorption is in physiological balance, thereby preventing the net gain or loss of bone tissue  
63 (8). Investigations of bone mechanics are necessary to fully understand how the mechanical  
64 properties of the bone microenvironment (BMeV) influence the biological functions such as  
65 bone turnover, and have been well developed in recent decades. *In-vitro* models mimicking the

66 BMEv are commonly used to study the role of mechanical properties in bone function and  
67 related diseases, such as cancer-induced bone metastasis (9, 10). However, these *in vitro*  
68 models do not fully recapitulate the complexity of the *in vivo* BMEv and hence lack  
69 fundamental components of the underlying biology (10).

70 Numerous studies using a variety of techniques have characterised the mechanical  
71 properties of bone at multiple length scales. Elastic and viscoelastic studies on both cortical  
72 and trabecular bones generally give Young's/shear moduli in the GPa range, though the results  
73 vary due to different experimental conditions (11-22). The Young's/shear modulus of  
74 trabecular bone is slightly lower than that of the cortical bone and occasionally as low as 10s -  
75 100s MPa (23, 24). The growth plate is more compliant than both cortical and trabecular bone  
76 tissues, with the Young's modulus ranging from 300 kPa to 50 MPa (25-28). In contrast, most  
77 studies on bone marrow have considered it as a purely viscous tissue (29), reporting viscosity  
78 values ranging from below 1 Pa·s to 100 Pa·s (29-31).

79 The structural complexity of bone samples can hinder accurate mechanical monitoring. A  
80 number of approaches have been taken to overcome this, through exposing bone to freezing  
81 (32, 33), dehydration (34), jet washing (35), polishing (12, 19, 36) and homogenising (37, 38)  
82 in addition to sectioning or fracturing. Although differences in the mechanical properties of the  
83 BMEvs may be extracted from samples prepared via these methods, such treatments  
84 substantially modify the surface structures (35) and consequently cause a shift in the measured  
85 mechanical properties (14, 19). However, the ability to quantify the mechanical properties of  
86 tissues at different length scales is critical in building models for theoretical simulations or in  
87 tissue engineering to replicate key features of such tissues. A recent study on intact bone  
88 marrow demonstrated both the feasibility and advantages of mechanical measurements using  
89 minimally deconstructed samples (39). In contrast to other studies, this work identified that  
90 the bone marrow is predominantly elastic, and suggested that the extracellular matrix  
91 contribution to the mechanical properties from fresh samples is essential to explain the  
92 observed heterogeneity. The accessible scale in this study was not sufficient to reveal the  
93 mechanical heterogeneity of bone, and suggested that techniques suitable for smaller scale  
94 characterisation are necessary.

95 Several methods to evaluate the local (*i.e.* cellular or subcellular ) mechanical properties of  
96 biological tissues have emerged over the last decade, including optical (40, 41) and acoustic  
97 (42) techniques. However, the structural and mechanical heterogeneity of the BMEv makes the  
98 application of these approaches particularly challenging. AFM enables characterisation at

99 length scales ranging from nm to tens of  $\mu\text{m}$  (25, 43-45), which is of particular relevance for  
100 understanding the biological mechanisms arising at the molecular and cellular level.

101 Here we focused on measuring the subcellular mechanical properties of the non-load bearing  
102 components of untreated bone on the internal surfaces (except for longitudinal splitting, which  
103 is necessary to access the tissue). Mechanical measurements were made using colloidal probe  
104 AFM, as opposed to nanoindentation (19, 34) or AFM with conventional sharp probes (13, 14,  
105 17, 25), due to the extreme softness of non-mineralised components in the BMev. Point  
106 measurements were performed randomly over a macro-scale ( $> 100 \mu\text{m}$ ) of bone surfaces. Both  
107 the elastic and viscoelastic properties of different regions of the BMev were quantified by  
108 fitting data obtained from force-distance and creep (*i.e.* strain relaxation) curves acquired with  
109 the AFM with appropriate mechanical models. Bones from young (6-8 weeks) and mature (11-  
110 13 weeks) mice were compared to determine any mechanical changes due to age-associated  
111 skeletal maturation. Finally, AFM force mapping was used to collect images (max. size  $100 \times$   
112  $100 \mu\text{m}^2$ ) that represented the heterogeneity of the BMev morphology and mechanics at a  
113 supracellular scale (from  $5 \mu\text{m}$  to  $100 \mu\text{m}$ ). The implications of our findings for the potential  
114 correlation with biological functions in bones are also discussed.

## 115 **MATERIALS AND METHODS**

### 116 **Animals**

117 All experiments involving animals were approved by the University of Sheffield project  
118 Applications and Amendments (Ethics) Committee and conducted in accordance with UK  
119 Home Office Regulations, under project license number 70/8964 (NJB). Mice were housed in  
120 a controlled environment with 12 hours light/dark cycle, at  $22^\circ\text{C}$ . Mice had access to food and  
121 water *ad libitum*, Teklad Diet 2918 (Envigo, UK). A total of 21 mice were used in these studies.

### 122 **Bone sample preparation**

123 Femurs from both young (6 to 8 weeks old, 9 bones from 8 mice) and mature (11 to 13  
124 weeks old, 24 bones from 13 mice) mice were used in this study unless otherwise stated. The  
125 mice were culled by cervical dislocation and the hind limbs detached from the pelvis at the  
126 femoral head. Muscle tissue connected to the bone was removed and the femur separated from  
127 the tibia at the knee joint. The dissected femurs were placed in phosphate buffered saline (PBS)  
128 (Lonza, US) at  $4^\circ\text{C}$  and split prior to measurement, which was within 36h of culling. A custom  
129 designed tool with a razor blade (Fig. S1a) was used to longitudinally fracture the bone, which  
130 was immobilised on a platform using a two component dental impression putty (Provil Novo

131 Light, Kulzer, UK). The split bone was then immersed in PBS and immobilised in a petri-dish  
132 (TPP, Switzerland) with the same dental impression material. Care was taken to maintain  
133 hydration of the exposed bone surface during the entire process.

#### 134 **Colloidal probe cantilever preparation**

135 Rectangular Si<sub>3</sub>N<sub>4</sub> cantilevers with a nominal spring constant of 0.02 N/m (MLCT cantilever  
136 B, Bruker, USA) were used for all AFM measurements. A polystyrene microsphere with 25  
137 µm diameter (Sigma Aldrich, USA) was attached to the cantilever using a UV-curing adhesive  
138 (NOA 81, Norland Inc., USA), using an AFM (Nanowizard III, JPK, Germany) and combined  
139 with an inverted optical microscope (Eclipse Ti, Nikon, Japan) as a micro-manipulator. Before  
140 attachment of the colloidal probe, the spring constant of each cantilevers was determined in air  
141 using the thermal noise method (46). To prevent strong non-specific binding between the probe  
142 and sample surface, the cantilever with attached colloidal probe and cantilever holder were  
143 passivated by 20 min immersion in 10 mg/mL bovine serum albumin (BSA), (Sigma Aldrich,  
144 USA). Excess BSA was removed by washing with 5 × 1 mL PBS.

#### 145 **AFM force spectroscopy and mapping**

146 AFM measurements were all performed on a Nanowizard III system (JPK, Germany) using  
147 a heated sample stage (35 to 37 °C). The cantilever deflection sensitivity was calibrated prior  
148 to each measurement, from the hard contact regime of force-distance curves (average of 10  
149 repeated curves) obtained from a clean petri-dish containing PBS. Prepared bone samples in  
150 PBS (Fig. 1a) were then mounted on the sample stage and probed after the temperature of the  
151 liquid had stabilised. Force-distance curves (Fig. 1b) were acquired at randomly selected  
152 positions from different regions of interest towards the distal end of each femur, as shown in  
153 Fig. 1a. For the majority of samples, 5 to 10 positions within each BMEv region were measured  
154 from each femur, but on occasion the number varied beyond this range depending on sample  
155 quality (*e.g.* surface roughness). The approach speed was 1 µm/s unless otherwise stated.  
156 Subsequently, curves with 3 s dwell under constant force (0.5 nN), *i.e.* creep curves, were also  
157 acquired from the same position (Fig. 1d). For both force-distance and creep curves, a  
158 minimum of 3 measurements were taken at each location.

159 A two-dimensional array of force-distance curves (*i.e.* an AFM map, one force curve per  
160 pixel) was then produced at randomly selected areas in the different bone regions, with 30 µm/s  
161 approach speed. The faster approach speed for force maps was chosen to minimise data  
162 collection time and consequent degradation of the sample. Before obtaining maps for analysis

163 (typically 1-1.6  $\mu\text{m}$  per pixel), low resolution “survey” maps (10 to 15  $\mu\text{m}$  per pixel) were  
164 collected to ensure that the major features in the selected region could be mapped without  
165 exceeding the 15  $\mu\text{m}$  Z range of the AFM.

166 All AFM measurements (force-distance curves, creep curves and force maps) on a single  
167 bone sample could typically be collected in 2 to 6 h. The measured bone surfaces were stable  
168 during this time (*i.e.* there was no significant dissociation or significantly different features in  
169 force curves observed). Reference force-distance curves were acquired on a petri-dish at the  
170 end of the measurements to check for colloidal probe contamination, with no significant  
171 contaminants (expected to manifest as strong adhesive features in the retract segment of the  
172 curves) found.

173 Raw data were exported as .txt format using JPK Data Processing and imported into  
174 customised algorithms in MATLAB (generated in-house by XC) for all subsequent analyses.  
175 Data processing scripts are available upon request.

#### 176 **Processing and analysis of force-distance curves**

177 Raw force-distance curves were first converted into force ( $F$ ) - indentation ( $\delta$ ) curves (Fig.  
178 1b) by applying baseline correction, determining the contact point and subtracting the  
179 cantilever deflection from the Z displacement in the contact regime (see Supporting Methods  
180 and Fig. S1b-e). Curves were fitted to a Hertz-Sneddon model (47) using a custom Matlab  
181 routine, with the Young's modulus ( $E_{H-S}$ ) and a virtual contact point as free fitting parameters  
182 (see Supporting Methods). The  $E_{H-S}$  at any measured position was determined by the mean  
183 value resulting from fitting to all repeated  $F$ - $\delta$  curves at the same position, unless otherwise  
184 specified. The quality of  $F$ - $\delta$  curves (*i.e.* tilt in baselines) and the fitting quality variation only  
185 had a minor impact on the results, as discussed in the Supporting Methods. It is important to  
186 note that the analysis described in this section implicitly assumes that the mechanical response  
187 of the BMeV is purely elastic.

#### 188 **Processing and analysis of creep curves**

189 Raw force ( $F$ ) – time ( $t$ ) curves from the dwell segment of force-distance curves were  
190 checked and discarded if the force could not be maintained constant by the feedback loop. The  
191 Z displacement value at the start of the dwell segment was subtracted from the displacement-  
192 time curve to yield an indentation variation ( $\Delta\delta$ ) - time ( $t$ ) curve (creep curve). This was fitted  
193 to both a Standard Linear Solid (SLS) model (Fig. S1f) and a Kelvin-Voigt (K-V) model (Fig.  
194 S1g), based on the theory developed by Cheng *et. al.* (48) (see Supporting Methods). The

195 instantaneous elastic modulus ( $E_1$ ), delayed elastic modulus ( $E_2$ ) and viscosity ( $\eta$ ) were free  
196 fitting parameters using the SLS model, and the Young's modulus ( $E_{K-V}$ ) and viscosity ( $\eta$ ) using  
197 the K-V model. Results were obtained from the mean value of repeated measurements at each  
198 position and those with low fit quality ( $R^2 < 0.9$ ) were discarded if not specified.

### 199 **Processing of AFM map data**

200 Three types of maps that graphically represented topography and mechanical properties of  
201 the scanned areas were generated from the AFM maps. Firstly, the trigger point map was  
202 constructed from a vertical position where the interaction force between the probe and the  
203 sample reached the trigger value. This represents the topography of the surface, including the  
204 indentation of the probe into the sample. Secondly, the contact point map was constructed from  
205 the vertical position where the probe was deemed to have made initial contact with the sample  
206 surface, determined from the contact point found for every force curve in the map using the  
207 triangle thresholding method, as shown in Fig. S1b. This represents an approximation to the  
208 topography at zero load and indentation. Thirdly, the elastic map was constructed from the  
209 Young's modulus  $E_{H-S}$  extracted from all force curves in the map using the Hertz-Sneddon  
210 model with a fitted contact point. For both the contact point map and the mechanical map,  
211 pixels with curves that could not be properly fitted due to not having a clear non-contact  
212 baseline, contact point and monotonic contact regime were considered as "missing data" and  
213 coloured black in the figures.

### 214 **Statistical analysis**

215 Statistical analyses were performed using OriginPro software. A normality test was applied  
216 to all distributions prior to any further analysis. Data were then analysed by the Kruskal-Wallis  
217 test for comparison between different groups. A statistically significant difference was defined  
218 as  $p < 0.05$ .

## 219 **RESULTS AND DISCUSSION**

220 Four regions of interest (Fig. 1a) within the BMeV were selected on the surface of split bones  
221 for AFM characterisation, due to their diverse composition and function: (i) cortical bone, (ii)  
222 growth plate, (iii) metaphysis and (iv) bone marrow in the diaphysis. The four regions of  
223 interest are shown by coloured outlines in the bright field image (Fig. 1a). In long bones such  
224 as the femur, the growth plate (also known as the epiphyseal plate or physis) is found at each  
225 end. This is where longitudinal bone growth takes place and is composed of a large number of  
226 chondrocytes and proteinaceous matrix. The narrow portion located just below the growth plate,

227 the metaphysis (4), was also examined. Previous preclinical *in vivo* studies from our group  
228 have identified this as the predominant region where circulating metastatic cancer cells home  
229 to and colonise in bone (49, 50). In the metaphysis, measurements were made on either the  
230 trabecular bone tissue or adjacent soft tissue in the surrounding marrow. In the diaphysis, we  
231 measured both the cortical bone, which comprises the outer shaft of the long bone, and the  
232 central bone marrow cavity.

233 Only bones with an acceptably smooth surface topography after splitting were used for AFM  
234 measurements. However, even on these specimens, the height range of the surface profile could  
235 still vary by several hundred micrometres across the whole bone. Tilt or curvature of the split  
236 surface occasionally caused fouling of the cantilever, or cantilever holder on parts of the bone  
237 that were higher than the region of interest. In these cases it was not possible to measure all  
238 regions of interest on the same specimen.



239

240 **Figure 1.** Methods of measuring the mechanical properties on internal bone surfaces (coloured  
241 version available online). (a) Bright field image of a prepared bone surface for AFM  
242 characterisation. Four regions of interest are indicated by coloured dashed lines: (1) cortical  
243 bone (red), (2) the growth plate (blue), (3) the metaphysis (green) and (4) bone marrow in  
244 diaphysis (magenta). (b) Representative force ( $F$ ) vs. indentation ( $\delta$ ) curve obtained during  
245 AFM probe approach (red) and retract (blue) taken on the bone surface. The contact position  
246 ( $\delta = 0$ ) was determined from the approach curve using triangle thresholding method described  
247 in the Supporting Material. (c) Examples of Hertz-Sneddon (H-S) model fits to the approach  
248 segment of a force-indentation curve (red) H-S fit either using a fixed contact point (blue dash-  
249 dotted line) determined using the triangle thresholding method (described in the Supporting  
250 Material), or with the contact point as a free fitting parameter (black dashed line). The star (★)  
251 shows the position of the contact point determined by the fit. (d) Representative creep curve  
252 ( $\Delta\delta$  vs.  $t$ ) obtained from the dwell segment of a force curve taken on the bone surface. The  
253 applied force (blue) was held constant for 3 s while the indentation depth increased (red) due

254 to the material being viscoelastic rather than purely elastic. (e) Example of the viscoelastic  
255 model fit (*black dashed line*) on a creep curve (*red line*).

256

257 **Point force-indentation measurements reveal mechanical heterogeneity spanning**  
258 **orders of magnitude over each of the different regions of the bone microenvironment,**  
259 **with all regions containing very soft (1-10 Pa) areas**

260 To probe the overall mechanical profile for each bone region, we first applied point force  
261 ( $F$ ) -indentation ( $\delta$ ) measurements at randomly selected positions within the specified region.  
262 A representative  $F$ - $\delta$  curve acquired on the surface of a split bone is shown in Fig. 1b (see  
263 Supporting Material and Fig. S1b-e for details of conversion of raw deflection-distance curves  
264 to  $F$ - $\delta$  curves). In the majority of curves, features associated with plastic deformation (yield  
265 points, plateaus etc.) were not observed, indicating that elastic or viscoelastic analyses were  
266 appropriate. For simplicity, the Young's modulus  $E_{H-S}$ , together with a virtual contact point,  
267 was obtained from Hertz-Sneddon model fits to the  $F$ - $\delta$  curves (Fig. 1c) assuming a purely  
268 elastic response. Data include bones from both young and mature mice.

269 Histograms of  $E_{H-S}$  for each bone region are shown in Fig. 2 (note the logarithmic scale of  
270 the horizontal axes), and follow neither normal nor log-normal distributions. The median  $E_{H-S}$   
271 is (i) cortical bone: 0.29 kPa, (ii) growth plate: 91 Pa, (iii) metaphysis: 17 Pa and (iv) bone  
272 marrow: 6.7 Pa. The mean  $E_{H-S}$  is (i) cortical bone: 2.7 kPa, (ii) growth plate: 0.19 kPa, (iii)  
273 metaphysis: 0.42 kPa and (iv) bone marrow: 0.14 kPa. These data indicate that the BMEv is  
274 very soft.

275 The distributions of  $E_{H-S}$  are very broad in all regions of interest, covering several orders of  
276 magnitude (see Fig. S2 for data on a linear scale), revealing the extreme mechanical  
277 heterogeneity within each region, which is consistent with the known heterogeneous structure  
278 of bone (12, 26, 33).

279 The mechanical distributions vary significantly between different bone regions ( $p < 10^{-4}$   
280 under Kruskal-Wallis test). Histograms of  $E_{H-S}$  measured for cortical bone show a wide  
281 distribution that lacks a sharp peak with a large portion of data at relatively high  $E_{H-S}$  (*i.e.*  $E_{H-S}$   
282  $> 10^3$  Pa), compared to the mechanical distribution of the other bone regions measured. This  
283 is in agreement with the high level of mineralisation in cortical bone (5). The mechanical  
284 distribution of both the growth plate and bone marrow are narrower, reflecting the more  
285 homogeneous composition and/or structure compared to other bone regions (51). The measured  
286 modulus of the metaphysis covers the widest range, due to the presence of both bone tissue and

287 bone marrow in this region, enhancing the structural and consequently mechanical  
288 heterogeneity.

289 Our approach has limits in acquiring data beyond the range shown in the histograms. At the  
290 low stiffness end of the distribution (Pa), errors are dominated by inaccuracies in determining  
291 the contact point, and tend to lead to an overestimate of the extracted moduli, so the  
292 distributions may extend to still lower moduli. At the high stiffness end (100s kPa) there is  
293 insufficient indentation at the maximum (trigger) forces used which may lead to an  
294 underestimate in the extracted moduli. As a control, the  $E_{H-S}$  extracted from hard wall  $F-\delta$   
295 curves, from the polystyrene petri-dish (expected  $E_{H-S} \sim 3$  GPa) under the same experimental  
296 conditions, does not exceed 10s to 100s kPa, which is the upper limit of  $E_{H-S}$  using the current  
297 AFM setup (that is focused on measuring soft components). The experimental setup is not  
298 sensitive to the GPa moduli of calcified cortical and trabecular bone previously described (11-  
299 15), as this is beyond the scope of this study.

300 However, our approach has the important advantage of being able to measure the subcellular  
301 properties of soft tissues, i.e. the cellular microenvironment. The Young's moduli found in the  
302 current study are orders of magnitude lower than the values reported in the majority of previous  
303 studies (11-28, 34). Direct comparison is difficult, but the ability to measure at the length scale  
304 of the cellular components is likely to contribute to the difference. Previous experiments  
305 performed with non-AFM indentation approaches (19, 34) normally average over large areas  
306 (hundreds  $\mu\text{m}^2$ ) and thus are unable to determine the properties of the smaller scale. Meanwhile,  
307 the low spring constant cantilever and relatively large contact radius probe were selected for  
308 use in the current study after extensive preliminary experiments, and provide sufficient force  
309 sensitivity to assess subcellular scale mechanics in soft tissue. This is in contrast to using  
310 conventional sharp AFM probes and enables accurate measurements of the soft components in  
311 the BMev, rather than simply being able to obtain measurements from the calcified regions  
312 (11-15).

313 In previous studies mechanical characterisation of the bone marrow is reported to be distinct  
314 from other regions within the BMev. The marrow region is traditionally considered as a viscous  
315 fluid (29) and there are only a few studies describing the elastic properties. . However, a recent  
316 study suggested that the bone marrow is predominantly elastic, and reported an effective  
317 Young's modulus ranging from 0.1 to 10.9 kPa measured at physiological temperature (39).  
318 This value obtained from porcine bone is similar to that obtained in the current study from  
319 murine bone, the difference in the resultant moduli most likely due to the use of rheological  
320 measurements instead of indentation. It is important to note that the bone marrow used both in

321 the previous (36) and the current study, is essentially intact with no processing (such as fixation)  
322 prior to measurement of the mechanical properties.

323 The H-S model with fitted contact point does not fit the entire  $F$ - $\delta$  curve perfectly (Fig. 1c).  
324 This is likely because the H-S model assumes that the probed material is homogeneous and  
325 linearly elastic, whereas the BMev is known to be structurally heterogeneous (5) (Additional  
326 errors in the model are discussed in the Supporting Materials). Elastic models describing  
327 discontinuous materials (*e.g.* cell-polymer brush model (52)) may be helpful for improved  
328 determination of the elasticity of the BMev. Also, the BMev is suggested to be a viscoelastic  
329 material in many studies (18, 21, 34, 53). To explore this further, we have characterised the  
330 viscoelastic properties by indentation creep measurements.



331  
332 **Figure 2.** Elastic properties of different bone regions (coloured version available online). (a)  
333 The Young's modulus ( $E_{H-S}$ ) of different regions in the BMev calculated using the Hertz-  
334 Sneddon model with fitted contact point. The central box spans the lower quartile to the upper  
335 quartile of the data. The solid line inside the box shows the median and whiskers present the  
336 lower and upper extremes. The mean values are indicated by black dashed lines. Data were  
337 obtained at randomly selected positions within regions of interest on bones from both young  
338 and mature mice. The Young's modulus reported at each position is the mean value of  
339 individual fits to all force-indentation curves taken at that location. Curves with strongly tilted  
340 baselines (*i.e.*  $d_b > d_c/4$ , as in Fig. S1c) were discarded. Results from low quality fittings (*i.e.*  
341  $R^2 < 0.9$ ) were also discarded. (b) Histograms of the  $E_{H-S}$  of different bone regions, as in (a).  
342 The corresponding histograms in linear scale are presented in Fig. S2.

343

344 **Point indentation-creep measurements demonstrate the bone microenvironment can**  
345 **be described as a heterogeneous viscoelastic Kelvin-Voigt solid.**

346 To extract the viscoelastic properties of the BMev, an equation based on a three elements  
347 Standard Linear Solid (SLS) model (Fig. S1f) developed by Cheng *et. al.* (48) was first used to  
348 fit the indentation change ( $\Delta\delta$ ) vs. creep time ( $t$ ) curves (Fig. 1d-e). The  $\Delta\delta$ - $t$  curves from 90%  
349 of the total 779 measured positions in all BMev regions of bones from both young and mature  
350 mice could be fitted well by this simple viscoelastic model ( $R^2 > 0.9$ ). This supports the premise  
351 that the BMev is viscoelastic rather than purely elastic.

352 The moduli presenting both the instantaneous elastic behaviour ( $E_1$ ) and the delayed elastic  
353 behaviour ( $E_2$ ) could be obtained from the SLS model (Fig. S3). It is notable that in the majority  
354 of cases  $E_1$  was significantly higher than  $E_2$ . For all positions that were well fitted by the SLS  
355 model, 93% have  $E_1 > 10E_2$  and 84% have  $E_1 > 100E_2$  (Fig. S3d). This indicated any strain  
356 caused by the instantaneous elasticity was negligible. Thus, the complete SLS model is largely  
357 unnecessary and can be further simplified to a two element Kelvin-Voigt (K-V) model (Fig.  
358 S1g). The  $\Delta\delta$  vs.  $t$  curves were then fitted to the simplified equation (for development and  
359 validation see the Supporting Material) based on the K-V model. Compared to using the SLS  
360 model, a similar number of measured positions could be fitted well ( $R^2 > 0.9$ ). This suggests  
361 the K-V model is sufficient to describe the viscoelasticity and the majority of BMev acts like  
362 a Kelvin-Voigt solid in nature. A K-V type solid is predominantly a viscous liquid at short time  
363 scales and predominantly an elastic solid at long time scales. This is biologically meaningful  
364 in the context of the BMev. Being a K-V type solid, ensures fast energy damping through the  
365 BMev in reaction to any abrupt mechanical loading, as well as maintaining a stable shape in  
366 the long term as part of the body scaffold.

367 The Young's modulus determined by the K-V model  $E_{K-V}$  and viscosity  $\eta$  for the different  
368 bone regions are shown in Fig. 3. The median  $E_{K-V}$  for the different regions of interest in the  
369 BMev, represented in Fig 3a, are (i) cortical bone: 0.86 kPa, (ii) growth plate: 1.5 kPa, (iii)  
370 metaphysis: 0.40 kPa and (iv) bone marrow: 0.14 kPa. The mean  $E_{K-V}$  for the different regions  
371 of interest in the BMev are (i) cortical bone: 4.2 kPa, (ii) growth plate: 2.9 kPa, (iii) metaphysis:  
372 1.7 kPa and (iv) bone marrow: 0.52 kPa. These values are significantly higher than the  $E_{H-S}$   
373 values obtained from the pure elastic fit (as in Fig. 2a, cortical bone:  $p < 0.01$ , growth plate:  $p$   
374  $< 10^{-33}$ , metaphysis:  $p < 10^{-18}$ , marrow:  $p < 10^{-22}$ ), which is not surprising since the latter does  
375 not take the presence of the viscous effect into account. The  $E_{K-V}$  distributions of all BMev  
376 regions (Fig. 3c) cover several orders of magnitude, with significant differences ( $p < 0.05$ )  
377 found between the bone regions.

378 The median resultant viscosity  $\eta$  of different BMeV regions are represented in Fig. 3b, as (i)  
379 cortical bone: 1.3 kPa·s, (ii) growth plate: 0.68 kPa·s, (iii) metaphysis: 0.29 kPa·s and (iv) bone  
380 marrow: 0.21 kPa·s. The mean resultant viscosity  $\eta$  of different BMeV regions are (i) cortical  
381 bone: 4.4 kPa·s, (ii) growth plate: 1.3 kPa·s, (iii) metaphysis: 1.3 kPa·s and (iv) bone marrow:  
382 0.31 kPa·s. The width of  $\eta$  distribution (Fig. 3d) is smaller than that of  $E_{K-V}$ , but still spans  
383 several orders of magnitude. Significant differences between different bone regions ( $p < 0.01$ )  
384 are also found as for the elasticity data. The creep time  $\tau$ , defined as the time for the strain to  
385 decay to  $1/e$  of its total change, can be calculated from the values of  $E_{K-V}$  and  $\eta$  of each measured  
386 position by  $\tau = 3\eta/E_{K-V}$ . The median creep time  $\tau$  of different BMeV regions are (i) cortical  
387 bone: 2.2 s, (ii) growth plate: 1.3 s, (iii) metaphysis: 2.1 s and (iv) bone marrow: 4.1 s. The  
388 mean creep time  $\tau$  of different BMeV regions are (i) cortical bone: 140 s, (ii) growth plate: 16  
389 s, (iii) metaphysis: 34 s and (iv) bone marrow: 36 s. The median creep time for all regions is  
390 similar to the indentation time in the elastic measurements, so creep relaxation and indentation  
391 are most likely occurring simultaneously in force-distance experiments. As such, the viscous  
392 drag force is likely to have a strong effect on the  $F$ - $\delta$  curve, especially in softer areas and around  
393 the contact point, where the loading rate is highest. This is most likely the main reason for the  
394 discrepancy between the Hertz-Sneddon fit and the modulus obtained from the creep data.

395 It is difficult to make comparisons with the previous published studies quantifying the  
396 viscoelastic properties of the hard regions of the bone, as these studies have measured the  
397 potential load bearing mechanics (i.e. mineralised regions) (18-20) while the current study  
398 focused on obtaining measurements from the cellular microenvironment. Studies of the  
399 metaphysis have measured trabecular bone (23, 34), whereas our measurements are dominated  
400 by a more marrow-like component which accounts for most of the surface area in the region  
401 quantified in our samples.

402 In contrast to the hard bone regions, the composition of bone marrow in previous studies are  
403 more comparable to the values reported here. The Young's modulus from both the elastic ( $E_H$ -  
404  $s$ ) and viscoelastic ( $E_{K-V}$ ) characterisation in our study, is in good agreement with the effective  
405 Young's modulus obtained in (39). The viscosity  $\eta$  from rheological measurements (29-31)  
406 ranges from far below 1 Pa·s to approximately 100 Pa·s. However, the resultant median and  
407 mean value of the bone marrow viscosity is significantly greater (0.2 k Pa·s and 0.3 k Pa·s) in  
408 our study. This can be explained by both sample preparation and instrument limits. The  
409 preparation and post-processing of the sample have been shown to affect the bone marrow  
410 viscosity. For instance, the viscosity of samples undergoing a freeze-thaw cycle prior to testing  
411 was lower by an order of magnitude compared to the fresh samples (31). Also, in our studies,

412 the bone marrow was not extracted from the medullary cavity. Thus, connections of the marrow  
 413 and bone tissues, and subsequently the rigidity of bone marrow structure, were maintained and  
 414 relatively intact.

415 It is notable that viscosity is often a function of velocity and consequently varies with  
 416 different measurement frequencies used in different studies. The viscosity of bone marrow has  
 417 been shown to decrease as the shear rate increases according to a power law (31, 39). In contrast  
 418 to dynamic measurements, the quasi-static method used in our study does not cover a broad  
 419 range of frequencies. This quasi-static method requires the creep time  $\tau$  of the sample to be  
 420 significantly larger than the time required to overcome system inertia during the transition from  
 421 indentation to dwelling (approximately 0.05 s). As  $\tau$  is correlated with both  $E_{K-V}$  and  $\eta$ , the  
 422 lower limit in detectable  $\tau$  indicates that the resultant viscosity  $\eta$  using such a quasi-static  
 423 method cannot be found to be much lower than the lowest values we measured (or  $E_{K-V}$  much  
 424 higher than current highest values we measured).



425

426 **Figure 3.** Viscoelastic properties of different bone regions (coloured version available online).  
 427 (a) The Young's modulus  $E_{K-V}$  and (b) viscosity  $\eta$  of different bone regions calculated from fits

428 to creep curves using the viscoelastic Kelvin-Voigt model. The central box spans the lower  
429 quartile to the upper quartile of the data. The solid line inside the box shows the median and  
430 whiskers represent the lower and upper extremes. The mean values are indicated by black  
431 dashed lines. Data were obtained at the same positions as elastic measurements (Fig. 2) from  
432 all mice bones. The results are from the mean value from all repeated measurements at each  
433 position. Results from low quality fittings (*i.e.*  $R^2 < 0.9$ ) were discarded. Histograms of (c)  $E_{K-V}$   
434  $\nu$  and (d)  $\eta$  of different bone regions are also shown.

435

### 436 **Aging impacts on the subcellular mechanical properties at the macro-scale of bone** 437 **marrow but only minor effects on other regions of the bone microenvironment**

438 Bone turnover in health and disease such as osteoporosis and cancer-induced bone loss show  
439 age dependent features (26, 49, 54-57). Therefore, comparing the mechanical properties of the  
440 BMeV from mice at different ages will elucidate changes occurring in the mechanics of the  
441 BMeV during skeletal maturation. The Young's modulus from the elastic model,  $E_{H-S}$ , together  
442 with the viscoelastic parameters  $E_{K-V}$  and  $\eta$  are classified into two groups: data obtained from  
443 young mice (age 6 to 8 weeks old, *blue*) and mature mice (age 11 to 13 weeks, *red*) (Fig. 4).  
444 Two groups of data in each region were compared by the Kruskal Wallis (KW) method.

445 The KW test comparing  $E_{H-S}$  (Fig. 4a) shows a minor yet statistically significant difference  
446 ( $0.05 > p > 0.03$ ) in the cortical bone and the metaphysis. Whereas the  $E_{H-S}$  of growth plate and  
447 the bone marrow did not vary with age. For  $E_{K-V}$  and  $\eta$  (Fig. 4b-c), the KW test demonstrates a  
448 high level of significance ( $p < 0.001$ ) in bone marrow but not for any other BMeV region. There  
449 are differences in the statistical comparison of pure elastic fit results (*i.e.*  $E_{H-S}$ ) and viscoelastic  
450 fit results (*i.e.*  $E_{K-V}$  and  $\eta$ ). The main reason is most likely that the Hertz-Sneddon model does  
451 not adequately describe the BMeV properties due to not considering the viscous force,  
452 especially in soft areas such as bone marrow.

453 Very few studies have been performed quantifying the mechanical properties of the BMeV  
454 in relation to age. Tensile tests on whole bones reported in 1976, showed only moderate  
455 differences between bones from humans at different ages (54). Recently, micro-/nano-  
456 indentation tests revealed that the mechanical properties of human cortical (55) and trabecular  
457 (56) bones were remarkably constant as a function of age. The elastic modulus of murine  
458 growth plate are reported to be significantly different between the embryonic stage and  
459 postnatal stage, age 2 week, but did not vary significantly through the next growth stages until  
460 adulthood (up to age 4 months) (25). These results are consistent with our findings. Dynamic  
461 stiffness of bone marrow stromal cells were significantly higher in adult horses compared to

462 foals (58), which is in agreement with the age dependent trend of bone marrow mechanics  
463 observed in our study.

464 Such statistical comparison reflects the impact of aging on the subcellular mechanical  
465 properties of different regions of the BMeV only at macro-scales. It would be helpful to  
466 integrate the impacts of aging and different length scales in future studies.



467  
468 **Figure 4.** Comparison of the mechanical properties of bones from young (*blue*) and mature  
469 (*red*) mice (coloured version available online). (a) The Young's modulus  $E_{H-S}$  obtained from  
470 the H-S model. Data are identical to those in Fig. 2. (b) The Young's modulus  $E_{K-V}$  and (c)  
471 viscosity  $\eta$  obtained from the K-V model. Data are identical to those in Fig. 3. The central box

472 spans the lower quartile to the upper quartile of the data. The solid line inside the box shows  
473 the median and caps below and above the box represent the lower and upper extremes. The  
474 mean values are indicated by black dashed lines. Dots represent individual data points overlaid  
475 on top of the boxplots. Data include results from both young and mature mice. The significance  
476 of statistical comparisons using the Kruskal Wallis method have been indicated above each  
477 group of boxplots (n.s.: not significant; \*:  $p < 0.05$ ; \*\*\*:  $p < 0.001$ ).

478

479 **Force mapping at the supracellular scale reveals high local mechanical heterogeneity**  
480 **within the different regions of the bone microenvironment.**

481 The data discussed in the previous sections were from point measurements, which does not  
482 inform on the spatial distribution of mechanical heterogeneity at the cellular scale. To explore  
483 this further, we carried out AFM force mapping. The maximum area for AFM force mapping  
484 in our setup is  $100 \times 100 \mu\text{m}^2$  with each pixel in the map down to  $1 \mu\text{m}^2$ . This ensures AFM  
485 mapping is sufficient to resolve the subcellular mechanical profile at a supracellular scale,  
486 considering the dimensions of most cells in bone (mean diameter ranging from 0.5 to  
487 approximately  $100 \mu\text{m}$ ) (59-61).

488 Fig 5a-c show representative maps obtained from cortical bone. The trigger point map (Fig.  
489 5a) reveals the surface topography of the BMeV at the trigger force. Tightly packed structures  
490 are visible (as indicated by the dashed circle), the size and shape of which are consistent with  
491 those expected for individual cells. An approximation to the surface topography of the BMeV  
492 at zero load is given by the contact point map (Fig. 5b). This appears significantly smoother  
493 than the trigger point map, due to the minimal indentation at the contact point and indicates  
494 that the bone surface after splitting is relatively smooth on a supracellular scale. The lateral  
495 resolution of both maps is limited by the colloidal probe and its convolution with the surface  
496 topography. Black pixels in Fig. 5b represent missing data, due to the force distance curves at  
497 these pixels being unsuitable for fitting (see Methods). These include the large black regions  
498 indicated by arrows where the topography exceeds the lower and upper limits of the AFM's  
499 vertical scan range. The corresponding map of  $E_{H-S}$  is shown in Fig. 5c. The  $R^2$  is greater than  
500 0.9 for 54% and 0.5 for 95% of all curves in this map, and independent of  $E_{H-S}$  values.  
501 Interestingly, the mechanical heterogeneity is correlated with the topographic structures in Figs  
502 5a and 5b, and thus helps to distinguish cellular and acellular components (the former is  
503 normally stiffer due to the nuclear, cytoskeletal and membrane components) and mineralisation  
504 status (mineralised components are expected to be much stiffer). These maps clearly show the  
505 mechanical complexity of the BMeV at the supracellular scale, which is likely to be important

506 for processes such as cell migration and proliferation that are mediated by the mechanical  
507 properties of both cells and surrounding extracellular matrix (2, 62).

508 Structure-correlated mechanical heterogeneity is found in all regions of interest in this study  
509 (Fig. 5d-f & S4) with  $E_{H-S}$  values covering several orders of magnitude. The structures and  
510 mechanical properties reflected in the AFM maps vary from region to region, and are difficult  
511 to accurately quantify as some areas are more difficult to map due to their large topography.  
512 Semi-quantitative comparison of the mechanical properties of different bone regions is feasible,  
513 by comparing the histograms of  $E_{H-S}$  calculated from the maps.

514 The histograms of  $E_{H-S}$ , corresponding to the Young's modulus maps in Fig. 5c-f, are shown  
515 in Fig. 5g. The histograms representing  $E_{H-S}$  obtained from all maps of each bone region  
516 (minimum 5 maps per region) are shown in Fig. 5h. These histograms include data from all  $F$ -  
517  $\delta$  curves with no selection criteria for curve or fit quality. As discussed in the Supporting  
518 Material, removal of poor curves has little effect on the distributions, so map data can be  
519 compared directly with individual curves from the point measurements (Fig. 2b). For all  
520 regions except the cortical bone, the shape of the distribution of  $E_{H-S}$  obtained from a single  
521 map (Fig. 5g), all maps (Fig. 5h) and individual curves covering the entire region (Fig. 2b) are  
522 comparable. The main peak in each histogram shifts by less than one order of magnitude  
523 between the different histograms for each bone region. This shows that the degree of elastic  
524 heterogeneity at the supracellular scale is comparable to the heterogeneity at a macroscopic  
525 scale. In contrast, the histograms from cortical bones are significantly different from each other.  
526 Compared to the profile of the entire cortical bone region (Fig. 2b), the peak of  $E_{H-S}$  distribution  
527 of the selected force map shifts by more than one order of magnitude. Also, the shape of the  
528 histogram for all maps obtained on the cortical bone are highly distinct from that of the  
529 histograms of either the selected map or the individual curves over the entire cortical bone  
530 region. This indicates that the overall heterogeneity of the subcellular mechanical properties in  
531 cortical bone results not only from the heterogeneity at the supracellular scale, but also  
532 variations at a macroscopic scale over the region.

533 It is notable that the approach speed used in force mapping was significantly increased (30  
534  $\mu\text{m/s}$ , compared to 1  $\mu\text{m/s}$  in point measurements). Correspondingly, the indentation time of  
535 the majority of  $F$ - $\delta$  curves in the maps is generally not greater than 0.3 s. This is significantly  
536 shorter than the mean/median creep time  $\tau$  of each of the BMeV regions, as described in the  
537 viscoelastic section. Within such short time scales, the BMeV will be predominantly viscous as  
538 a K-V type solid (see Supporting Material). We should therefore regard the modulus values

539 obtained from indentation as an effective modulus, specific to strain rate, and encompassing  
 540 both elastic and viscous contributions.



541

542 **Figure 5.** Mechanical heterogeneity of different bone regions at supracellular scale (coloured  
 543 version available online). (a-c) Example of AFM maps obtained from a randomly selected  
 544 position on the cortical bone. (a) Topographic map showing the height at which the trigger  
 545 force was reached. Dashed circle highlights an observed spherical structure. (b) Topographic  
 546 map showing the height at which the probe first makes contact with the surface. The position  
 547 of the contact point was determined by the triangle thresholding method as in Fig. S1b. (c) Map  
 548 of the measured Young's modulus  $E_{H-S}$  from all force curves in the map. Curves with strongly  
 549 tilted baselines (*i.e.*  $d_b > d_c/4$ , as in Fig. S1c) were discarded. (d-f) Examples of  $E_{H-S}$  maps  
 550 obtained from (d) growth plate, (e) metaphysis and (f) bone marrow. The data include values  
 551 from curves with strongly tilted baselines (*i.e.*  $d_b > d_c$ ). For all maps in (a-f), missing data (*i.e.*  
 552 no proper force-indentation curves could be fitted) are indicated by black pixels (by white  
 553 arrows). The size scale of the maps has been indicated at the bottom of each map. (g)

554 Histograms of the  $E_{H-S}$  distribution compiled from the maps in (c-f). (h) Histograms of the  $E_{H-}$   
555  $S$  distribution for different bone regions compiled from all AFM maps. For each region, at least  
556 5 maps were recorded and each map was collected from a different mouse.

557

## 558 CONCLUSION

559 In this work, we have used minimally processed murine bone samples to quantify the micro-  
560 mechanical properties of four distinct regions of interest using AFM. The mechanical profile  
561 of each bone region at macro-scale, revealed by point force-indentation or creep measurements  
562 using pure elastic or viscoelastic models, was found to be highly heterogeneous. The  
563 mechanical properties of different BMev regions have also shown significant differences.  
564 Moreover, aging was found to strongly impact the viscoelastic properties of the region  
565 comprising the bone marrow while having no or minimal effects in other regions of interest.

566 All bone regions contained extremely soft areas (*i.e.* the Young's moduli from both elastic  
567 and viscoelastic models was as low as a few Pascal), and the overall moduli were much lower  
568 than the values reported from previous studies performed on individual cells *in vitro*, whole  
569 tissues *ex vivo* or highly processed bone samples. Indeed, the viscoelastic model described the  
570 mechanical response better than the elastic model. The majority of the BMev within all regions  
571 of interest acted as a Kelvin-Voigt type solid.

572 This study demonstrates the feasibility of obtaining high-resolution AFM data and maps  
573 reflecting both 3D morphology and mechanical properties from complex bone tissues. AFM  
574 maps revealed that the mechanical properties of all bone regions are highly heterogeneous at  
575 the cellular/supracellular scales, ranging over 3 to 5 orders of magnitude. Such unique  
576 mechanical architecture may impact on a substantial number of active biological processes,  
577 such as bone remodelling, vascularisation, hematopoiesis and on cancer-induced bone disease.  
578 With further improvements, such as combining with post-AFM optical images, this AFM based  
579 system will be a powerful tool for further characterisation of bones in the presence of stimuli  
580 (*e.g.* hormones, cancer cells and therapeutics) or addressing mechanically relevant questions  
581 on other complex biological structures.

## 582 SUPPORTING INFORMATION.

583 The Supporting Material contains supplementary methods and figures S1–7.

584 **AUTHOR CONTRIBUTIONS**

585 XC designed the study, performed the experiments, analysed and interpreted the data, and  
586 wrote the manuscript. RH prepared the bone samples, interpreted the data and wrote the  
587 manuscript. NM provided support for the experiments, interpreted the data and wrote the  
588 manuscript. RJH improved the theoretical model, interpreted the data and wrote the manuscript.  
589 IH, NJB and JKH designed the study, interpreted the data, wrote the manuscript and directed  
590 the project.

591 **ACKNOWLEDGEMENTS**

592 This research was supported by Cancer Research UK and the Engineering and Physical  
593 Sciences Research Council (Grant Number: A21082). We thank Prof. Keith Hunter, Dr. Ashley  
594 Cadby and Miss Natasha Cowley (University of Sheffield) for fruitful discussions.

595 **COMPETING INTERESTS**

596 We declare no competing interests relevant to this work.

597 **REFERENCES**

- 598 1. Northey, J. J., L. Przybyla, and V. M. Weaver. 2017. Tissue Force Programs Cell Fate and  
599 Tumor Aggression. *Cancer Discovery* 7(11):1224-1237.
- 600 2. Lange, J. R., and B. Fabry. 2013. Cell and tissue mechanics in cell migration. *Experimental*  
601 *Cell Research* 319(16):2418-2423.
- 602 3. Cavo, M., M. Fato, L. Peñuela, F. Beltrame, R. Raiteri, and S. Scaglione. 2016.  
603 Microenvironment complexity and matrix stiffness regulate breast cancer cell activity in a 3D  
604 in vitro model. *Scientific Reports* 6:35367.
- 605 4. Bussard, K. M., C. V. Gay, and A. M. Mastro. 2008. The bone microenvironment in metastasis;  
606 what is special about bone? *Cancer and Metastasis Reviews* 27(1):41-55.
- 607 5. Morgan, E. F., G. L. Barnes, and T. A. Einhorn. 2013. The bone organ system: Form and  
608 function. *Osteoporosis (4th Edition)*. R. Marcus, D. Feldman, D. W. Dempster, M. Luckey, and  
609 J. A. Cauley, editors. Academic Press, San Diego, pp. 3-20.
- 610 6. Florencio-Silva, R., G. R. d. S. Sasso, E. Sasso-Cerri, M. J. Simoes, and P. S. Cerri. 2015.  
611 Biology of bone tissue: Structure, function, and factors that influence bone cells. *BioMed*  
612 *Research International* 2015:17.
- 613 7. Morgan, E. F., G. U. Unnikrisnan, and A. I. Hussein. 2018. Bone mechanical properties in  
614 healthy and diseased states. *Annual Review of Biomedical Engineering* 20(1):119-143.
- 615 8. Robling, A. G., A. B. Castillo, and C. H. Turner. 2006. Biomechanical and molecular regulation  
616 of bone remodeling. *Annual Review of Biomedical Engineering* 8(1):455-498.
- 617 9. Ruppender, N. S., A. R. Merkel, T. J. Martin, G. R. Mundy, J. A. Sterling, and S. A. Guelcher.  
618 2010. Matrix rigidity induces osteolytic gene expression of metastatic breast cancer cells. *PLoS*  
619 *ONE* 5(11):e15451.
- 620 10. Vanderburgh, J. P., S. A. Guelcher, and J. A. Sterling. 2018. 3D bone models to study the  
621 complex physical and cellular interactions between tumor and the bone microenvironment.  
622 *Journal of Cellular Biochemistry* 119(7):5053-5059.
- 623 11. Hoerth, R. M., B. M. Seidt, M. Shah, C. Schwarz, B. M. Willie, G. N. Duda, P. Fratzl, and W.  
624 Wagermaier. 2014. Mechanical and structural properties of bone in non-critical and critical  
625 healing in rat. *Acta Biomaterialia* 10(9):4009-4019.

- 626 12. Zebaze, R. M. D., A. C. Jones, M. G. Pandy, M. A. Knackstedt, and E. Seeman. 2011.  
627 Differences in the degree of bone tissue mineralization account for little of the differences in  
628 tissue elastic properties. *Bone* 48(6):1246-1251.
- 629 13. Tai, K., M. Dao, S. Suresh, A. Palazoglu, and C. Ortiz. 2007. Nanoscale heterogeneity promotes  
630 energy dissipation in bone. *Nature materials* 6:454. Article.
- 631 14. Lefèvre, E., C. Guivier-Curien, M. Pithioux, and A. Charrier. 2013. Determination of  
632 mechanical properties of cortical bone using AFM under dry and immersed conditions.  
633 *Computer Methods in Biomechanics and Biomedical Engineering* 16(sup1):337-339.
- 634 15. Dong, X. N., R. L. Acuna, Q. Luo, and X. Wang. 2012. Orientation dependence of progressive  
635 post-yield behavior of human cortical bone in compression. *Journal of Biomechanics*  
636 45(16):2829-2834.
- 637 16. Oftadeh, R., V. Entezari, G. Spörri, C. Villa-Camacho Juan, H. Krigbaum, E. Strawich, L.  
638 Graham, C. Rey, H. Chiu, R. Müller, N. Hashemi Hamid, A. Vaziri, and A. Nazarian. 2015.  
639 Hierarchical analysis and multi-scale modelling of rat cortical and trabecular bone. *Journal of*  
640 *The Royal Society Interface* 12(106):20150070.
- 641 17. Asgari, M., J. Abi-Rafeh, G. N. Hendy, and D. Pasini. 2019. Material anisotropy and elasticity  
642 of cortical and trabecular bone in the adult mouse femur via AFM indentation. *Journal of the*  
643 *Mechanical Behavior of Biomedical Materials* 93:81-92.
- 644 18. Bembey, A. K., M. L. Oyen, A. J. Bushby, and A. Boyde. 2006. Viscoelastic properties of bone  
645 as a function of hydration state determined by nanoindentation. *Philosophical Magazine* 86(33-  
646 35):5691-5703.
- 647 19. Pathak, S., J. Gregory Swadener, S. R. Kalidindi, H.-W. Courtland, K. J. Jepsen, and H. M.  
648 Goldman. 2011. Measuring the dynamic mechanical response of hydrated mouse bone by  
649 nanoindentation. *Journal of the Mechanical Behavior of Biomedical Materials* 4(1):34-43.
- 650 20. Shepherd, T. N., J. Zhang, T. C. Ovaert, R. K. Roeder, and G. L. Niebur. 2011. Direct  
651 comparison of nanoindentation and macroscopic measurements of bone viscoelasticity. *Journal*  
652 *of the Mechanical Behavior of Biomedical Materials* 4(8):2055-2062.
- 653 21. Wu, Z., T. C. Ovaert, and G. L. Niebur. 2012. Viscoelastic properties of human cortical bone  
654 tissue depend on gender and elastic modulus. *Journal of Orthopaedic Research* 30(5):693-699.
- 655 22. Ojanen, X., P. Tanska, M. K. H. Malo, H. Isaksson, S. P. Väänänen, A. P. Koistinen, L. Grassi,  
656 S. P. Magnusson, S. M. Ribøl-Madsen, R. K. Korhonen, J. S. Jurvelin, and J. Töyräs. 2017.  
657 Tissue viscoelasticity is related to tissue composition but may not fully predict the apparent-  
658 level viscoelasticity in human trabecular bone – An experimental and finite element study.  
659 *Journal of Biomechanics* 65:96-105.
- 660 23. Pugh, J. W., R. M. Rose, and E. L. Radin. 1973. Elastic and viscoelastic properties of trabecular  
661 bone: Dependence on structure. *Journal of Biomechanics* 6(5):475-485.
- 662 24. Manda, K., S. Xie, R. J. Wallace, F. Levrero-Florencio, and P. Pankaj. 2016. Linear  
663 viscoelasticity - bone volume fraction relationships of bovine trabecular bone. *Biomechanics*  
664 *and Modeling in Mechanobiology* 15(6):1631-1640.
- 665 25. Prein, C., N. Warmbold, Z. Farkas, M. Schieker, A. Aszodi, and H. Clausen-Schaumann. 2016.  
666 Structural and mechanical properties of the proliferative zone of the developing murine growth  
667 plate cartilage assessed by atomic force microscopy. *Matrix Biology* 50:1-15.
- 668 26. Villemure, I., and I. A. F. Stokes. 2009. Growth plate mechanics and mechanobiology. A survey  
669 of present understanding. *Journal of Biomechanics* 42(12):1793-1803.
- 670 27. Cohen, B., G. S. Chorney, D. P. Phillips, H. M. Dick, and V. C. Mow. 1994. Compressive  
671 stress-relaxation behavior of bovine growth plate may be described by the nonlinear biphasic  
672 theory. *Journal of Orthopaedic Research* 12(6):804-813.
- 673 28. Sergerie, K., M.-O. Lacoursière, M. Lévesque, and I. Villemure. 2009. Mechanical properties  
674 of the porcine growth plate and its three zones from unconfined compression tests. *Journal of*  
675 *Biomechanics* 42(4):510-516.
- 676 29. Gurkan, U. A., and O. Akkus. 2008. The mechanical environment of bone marrow: A review.  
677 *Annals of Biomedical Engineering* 36(12):1978-1991. journal article.
- 678 30. Bryant, J. D., T. David, P. H. Gaskell, S. King, and G. Lond. 1989. Rheology of bovine bone  
679 marrow. *Proceedings of the Institution of Mechanical Engineers. Part H, Journal of engineering*  
680 *in medicine* 203(2):71-75.

- 681 31. Metzger, T. A., J. M. Shudick, R. Seekell, Y. Zhu, and G. L. Niebur. 2014. Rheological  
682 behavior of fresh bone marrow and the effects of storage. *Journal of the Mechanical Behavior*  
683 *of Biomedical Materials* 40:307-313.
- 684 32. Schaffler, M. B., and D. B. Burr. 1988. Stiffness of compact bone: Effects of porosity and  
685 density. *Journal of Biomechanics* 21(1):13-16.
- 686 33. Morgan, E. F., H. H. Bayraktar, and T. M. Keaveny. 2003. Trabecular bone modulus–density  
687 relationships depend on anatomic site. *Journal of Biomechanics* 36(7):897-904.
- 688 34. Isaksson, H., S. Nagao, M. Małkiewicz, P. Julkunen, R. Nowak, and J. S. Jurvelin. 2010.  
689 Precision of nanoindentation protocols for measurement of viscoelasticity in cortical and  
690 trabecular bone. *Journal of Biomechanics* 43(12):2410-2417.
- 691 35. Knapp, H. F., A. Stemmer, G. C. Reilly, P. Niederer, and M. L. K. Tate. 2002. Development of  
692 preparation methods for and insights obtained from atomic force microscopy of fluid spaces in  
693 cortical bone. *Scanning* 24(1):25-33.
- 694 36. Tai, K., H. J. Qi, and C. Ortiz. 2005. Effect of mineral content on the nanoindentation properties  
695 and nanoscale deformation mechanisms of bovine tibial cortical bone. *Journal of Materials*  
696 *Science: Materials in Medicine* 16(10):947-959.
- 697 37. Zhong, Z., and O. Akkus. 2011. Effects of age and shear rate on the rheological properties of  
698 human yellow bone marrow. *Biorheology* 48(2):89-97.
- 699 38. Bryant, J. D. 1988. On the mechanical function of marrow in long bones. *Engineering in*  
700 *medicine* 17(2):55-58.
- 701 39. Jansen, L. E., N. P. Birch, J. D. Schiffman, A. J. Crosby, and S. R. Peyton. 2015. Mechanics of  
702 intact bone marrow. *Journal of the Mechanical Behavior of Biomedical Materials* 50:299-307.
- 703 40. Eom, J., S. Park, J. Lee, and B. H. Lee. 2017. Noncontact measurement of elasticity using  
704 optical fiber-based heterodyne interferometer and laser ultrasonics. In *25th International*  
705 *Conference on Optical Fiber Sensors*. SPIE. 4.
- 706 41. Schlüßler, R., S. Möllmert, S. Abuhattum, G. Cojoc, P. Müller, K. Kim, C. Möckel, C.  
707 Zimmermann, J. Czarske, and J. Guck. 2018. Mechanical mapping of spinal cord growth and  
708 repair in living zebrafish larvae by brillouin imaging. *Biophysical Journal* 115(5):911-923.
- 709 42. Beshtawi, I. M., R. Akhtar, M. C. Hillarby, C. O'Donnell, X. Zhao, A. Brahma, F. Carley, B.  
710 Derby, and H. Radhakrishnan. 2013. Scanning acoustic microscopy for mapping the  
711 microelastic properties of human corneal tissue. *Current Eye Research* 38(4):437-444.
- 712 43. Darling, E. M., S. Zauscher, and F. Guilak. 2006. Viscoelastic properties of zonal articular  
713 chondrocytes measured by atomic force microscopy. *Osteoarthritis and Cartilage* 14(6):571-  
714 579.
- 715 44. Han, L., A. J. Grodzinsky, and C. Ortiz. 2011. Nanomechanics of the cartilage extracellular  
716 matrix. *Annual review of materials research* 41(1):133-168.
- 717 45. Stolz, M., R. Gottardi, R. Raiteri, S. Miot, I. Martin, R. Imer, U. Stauffer, A. Raducanu, M.  
718 Duggelin, W. Baschong, A. U. Daniels, N. F. Friederich, A. Aszodi, and U. Aebi. 2009. Early  
719 detection of aging cartilage and osteoarthritis in mice and patient samples using atomic force  
720 microscopy. *Nature Nanotechnology* 4(3):186-192. 10.1038/nnano.2008.410.
- 721 46. Hutter, J. L., and J. Bechhoefer. 1993. Calibration of atomic force microscope tips. *Review of*  
722 *Scientific Instruments* 64(7):1868-1873.
- 723 47. Sneddon, I. N. 1965. The relation between load and penetration in the axisymmetric boussinesq  
724 problem for a punch of arbitrary profile. *Int. J. Eng. Sci.* 3(1):47-57.
- 725 48. Cheng, L., X. Xia, L. E. Scriven, and W. W. Gerberich. 2005. Spherical-tip indentation of  
726 viscoelastic material. *Mechanics of Materials* 37(1):213-226.
- 727 49. Wang, N., K. J. Reeves, H. K. Brown, A. C. M. Fowles, F. E. Docherty, P. D. Ottewell, P. I.  
728 Croucher, I. Holen, and C. L. Eaton. 2015. The frequency of osteolytic bone metastasis is  
729 determined by conditions of the soil, not the number of seeds: Evidence from in vivo models  
730 of breast and prostate cancer. *Journal of Experimental & Clinical Cancer Research* 34(1):124.  
731 journal article.
- 732 50. Ottewell, P. D., N. Wang, H. K. Brown, K. J. Reeves, C. A. Fowles, P. I. Croucher, C. L. Eaton,  
733 and I. Holen. 2014. Zoledronic acid has differential antitumor activity in the pre- and  
734 postmenopausal bone microenvironment in vivo. *Clin Cancer Res* 20(11):2922-2932.

- 735 51. Ottewell, P. D., N. Wang, H. K. Brown, C. A. Fowles, P. I. Croucher, C. L. Eaton, and I. Holen.  
736 2015. OPG-Fc inhibits ovariectomy-induced growth of disseminated breast cancer cells in  
737 bone. *International Journal of Cancer* 137(4):968-977.
- 738 52. Guz, N., M. Dokukin, V. Kalaparthi, and I. Sokolov. 2014. If cell mechanics can be described  
739 by elastic modulus: Study of different models and probes used in indentation experiments.  
740 *Biophysical Journal* 107(3):564-575.
- 741 53. Marek, P. 2012. Cortical bone tissue viscoelastic properties and its constitutive equation -  
742 preliminary studies. *Archive of Mechanical Engineering* 59(1):31-52.
- 743 54. Evans, F. G. 1976. Mechanical properties and histology of cortical bone from younger and older  
744 men. *The Anatomical Record* 185(1):1-11.
- 745 55. Mirzaali, M. J., J. J. Schwiedrzik, S. Thaiwichai, J. P. Best, J. Michler, P. K. Zysset, and U.  
746 Wolfram. 2016. Mechanical properties of cortical bone and their relationships with age, gender,  
747 composition and microindentation properties in the elderly. *Bone* 93:196-211.
- 748 56. Peters, A. E., R. Akhtar, E. J. Comerford, and K. T. Bates. 2018. The effect of ageing and  
749 osteoarthritis on the mechanical properties of cartilage and bone in the human knee joint.  
750 *Scientific Reports* 8(1):5931.
- 751 57. Prabhakar, M., W. B. Ershler, and D. L. Longo. 2009. Bone marrow, thymus and blood:  
752 Changes across the lifespan. *Aging Health* 5(3):385-393.
- 753 58. Kopesky, P. W., H. Y. Lee, E. J. Vanderploeg, J. D. Kisiday, D. D. Frisbie, A. H. K. Plaas, C.  
754 Ortiz, and A. J. Grodzinsky. 2010. Adult equine bone marrow stromal cells produce a cartilage-  
755 like ECM mechanically superior to animal-matched adult chondrocytes. *Matrix Biol.* 29(5):427-  
756 438.
- 757 59. Noguchi, N., S. Tabata, M. Kurata, and K. Matsumoto. 1998. Cellular size of bone marrow  
758 cells from rats and beagle dogs. *The Journal of toxicological sciences* 23(3):189-195.
- 759 60. Hu, Y., B. Ek-Rylander, E. Karlström, M. Wendel, and G. Andersson. 2008. Osteoclast size  
760 heterogeneity in rat long bones is associated with differences in adhesive ligand specificity.  
761 *Experimental Cell Research* 314(3):638-650.
- 762 61. Schmitt, A., J. Guichard, J.-M. Massé, N. Debili, and E. M. Cramer. 2001. Of mice and men:  
763 Comparison of the ultrastructure of megakaryocytes and platelets. *Experimental Hematology*  
764 29(11):1295-1302.
- 765 62. Provenzano, P. P., and P. J. Keely. 2011. Mechanical signaling through the cytoskeleton  
766 regulates cell proliferation by coordinated focal adhesion and Rho GTPase signaling. *Journal*  
767 *of Cell Science* 124(8):1195.
- 768
